# Supplementary material for: Crack-free controlled wrinkling of a bilayer film with a gradient interface
Source: Royal Society of Chemistry journal article supplement (doi:10.1039/c2sm25487e), 2012-01-01
Supplement: c2sm25487e.pdf [file c2sm25487e.pdf]

Supplementary material for

## Crack-free Controlled Wrinkling of a Bilayer Film with a Gradient Interface

Yan Xuan,<sup>a</sup> Xu Guo,<sup>a</sup> Yushuang Cui,<sup>a</sup> Changsheng Yuan,<sup>\*a</sup> Haixiong Ge,<sup>a</sup> Bo Cui,<sup>b</sup> Yanfeng Chen<sup>a</sup>

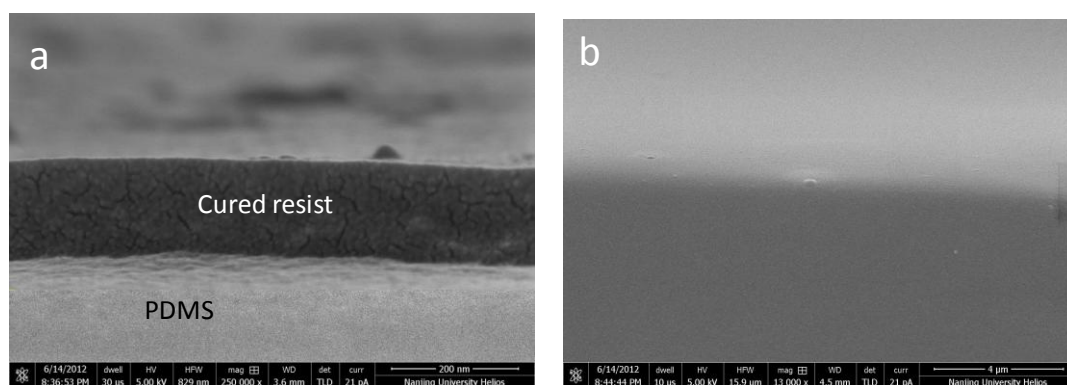

**Figure S1.** SEM images of the cross-section of the samples (a) without a gradient interface and (b) with a gradient interface.

Electronic Supplementary Material (ESI) for Soft Matter  
This journal is © The Royal Society of Chemistry 2012

---

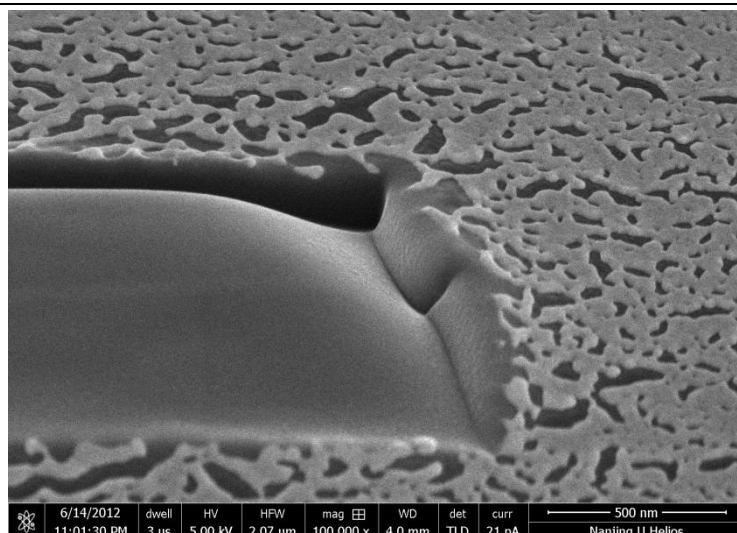

**Figure S2. SEM image of the sample cut by FIB.**
